# Supplementary material for: Bioconversion of mango peels into itaconic acid through submerged fermentation and statistical optimization of parameters through response surface methodology
Source: PeerJ. 2024 Oct 18;12:e18188. doi: 10.7717/peerj.18188 (PMC11493022; doi:10.7717/peerj.18188)
Supplement: Supplemental Information 1 [file peerj-12-18188-s001.xlsx]

## Sheet: Sheet1
	Sr. No.	A	B	C	D	E	Itaconic acid (g/L)
							T1	T2	T3	MeanValue
	1	35	72	5	3	200	3.44	3.49	3.47	3.46
	2	30	48	3	2	100	2.93	2.97	2.95	2.95
	3	20	24	4	1	300	2.75	2.76	2.74	2.75
	4	30	144	7	4	150	4.33	4.36	4.35	4.34
	5	32	120	5	3	200	4.51	4.73	4.68	4.64
	6	40	24	8	5	300	3.4	3.41	3.45	3.42
	7	30	72	6	3	100	3.44	3.47	3.43	3.45
	8	20	48	3	1	150	2.83	2.86	2.87	2.85
	9	30	96	4	5	250	3.86	3.87	3.85	3.86
	10	35	120	5	4	100	3.95	4.01	3.99	3.98
	11	32	144	7	2	150	4.16	4.13	4.17	4.15
	12	25	168	6	4	250	4.55	4.59	4.56	4.57
	13	30	96	4	5	200	3.81	3.84	3.85	3.83
	14	20	72	8	1	300	3.45	3.45	3.44	3.45
	15	25	168	3	5	150	4.45	4.46	4.42	4.44
	16	32	144	5	4	250	4.27	4.31	4.29	4.29
	17	30	120	6	3	200	3.98	4.01	3.97	3.98
	18	40	24	8	2	150	3.04	3.06	3.02	3.04
	19	20	72	2	5	300	3.52	3.51	3.51	3.51
	20	35	48	7	1	200	3.13	3.16	3.14	3.14
	21	32	144	5	4	250	4.28	4.33	4.25	4.29
	22	30	168	3	3	300	4.29	4.38	4.39	4.35
	23	20	72	4	5	150	3.51	3.52	3.55	3.53
	24	32	48	6	4	300	3.43	3.43	3.44	3.43
	25	40	24	8	2	200	3.07	3.08	3.05	3.07
	26	32	120	6	5	100	4.12	4.14	4.11	4.12
	27	25	48	4	2	150	3.02	3.03	3.02	3.02
	28	32	168	7	3	250	4.56	4.51	4.55	4.54
	29	20	24	3	1	200	2.61	2.65	2.66	2.64
	30	35	144	5	5	250	4.45	4.44	4.43	4.44
	31	25	120	6	3	300	4.02	4.03	4.02	4.02
	32	40	72	3	1	150	3.17	3.18	3.11	3.15
